# Supplementary material for: Use of TLC-Densitometric Method for Determination of Valproic Acid in Capsules
Source: Molecules. 2022 Jan 24;27(3):752. doi: 10.3390/molecules27030752 (PMC8839749; doi:10.3390/molecules27030752)
Supplement: Supplementary file 1 [file molecules-27-00752-s001.zip › molecules-1571098-supplementary.pdf]

## Supplementary Materials

# Use of TLC-densitometric Method for Determination of Valproic Acid in Capsules

Wioletta Parys\* and Alina Pyka-Pająk\*

Department of Analytical Chemistry, Faculty of Pharmaceutical Sciences in Sosnowiec, Medical University of Silesia in Katowice, Jagiellońska 4, 41-200 Sosnowiec, Poland

\*Correspondence: wparys@sum.edu.pl (W.P.); apyka@sum.edu.pl (A.P.-P.); Tel.: +48-32-364-15-34 (W.P.); +48-32-364-15-30 (A.P.-P.)

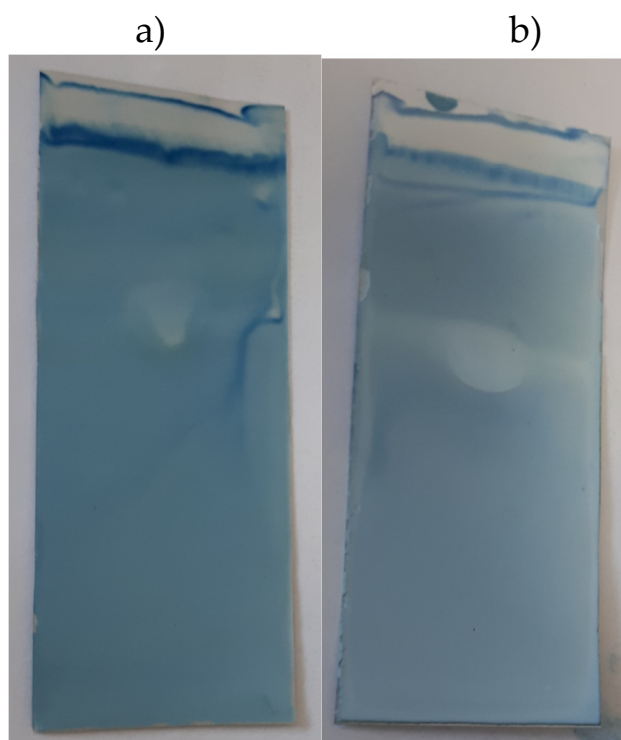

**Figure S1:** Valproic acid after detection with an aqueous solution of bromocresol green:

(a) dipping the plate into the solution (immediately after immersion)

(b) immersing the plate into the solution (after 6 minutes of drying at 120°C)

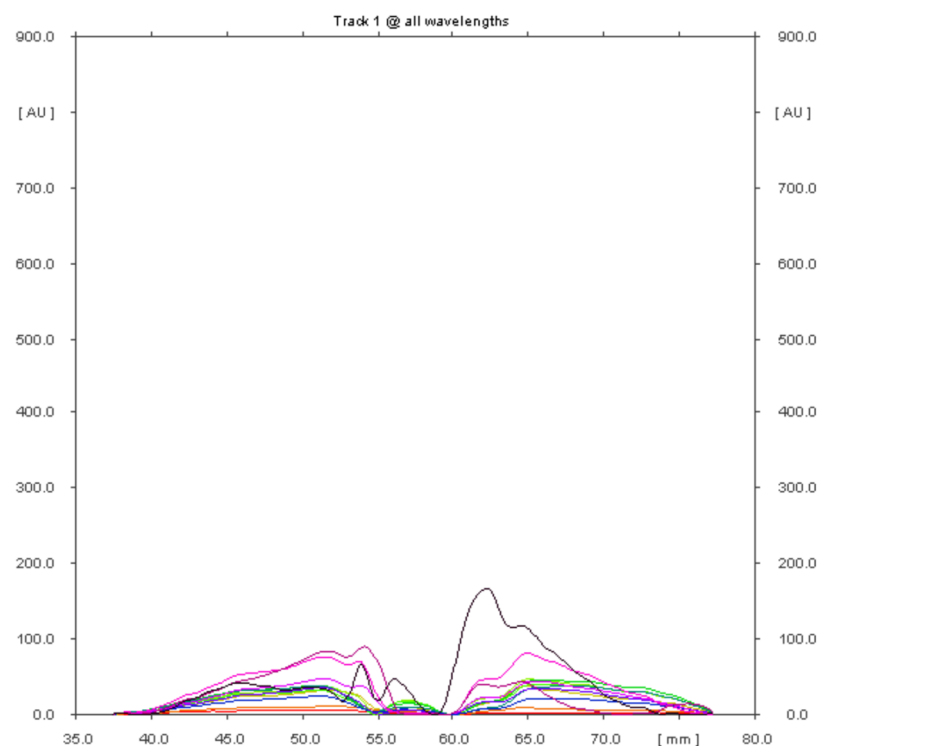

**Figure S2:** Densitogram of valproic acid after detection with bromocresol green.

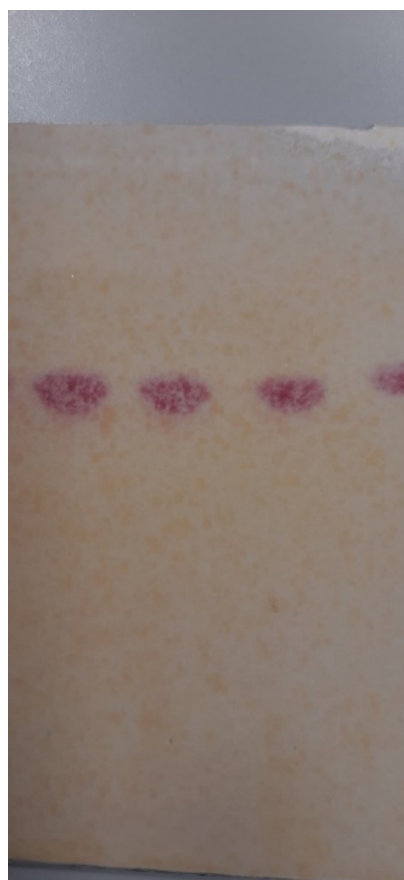

**Figure S3:** Valproic acid after detection by spraying with 2', 7'-dichlorofluorescein - aluminum chloride-iron (III) chloride system as a visualizing reagent.

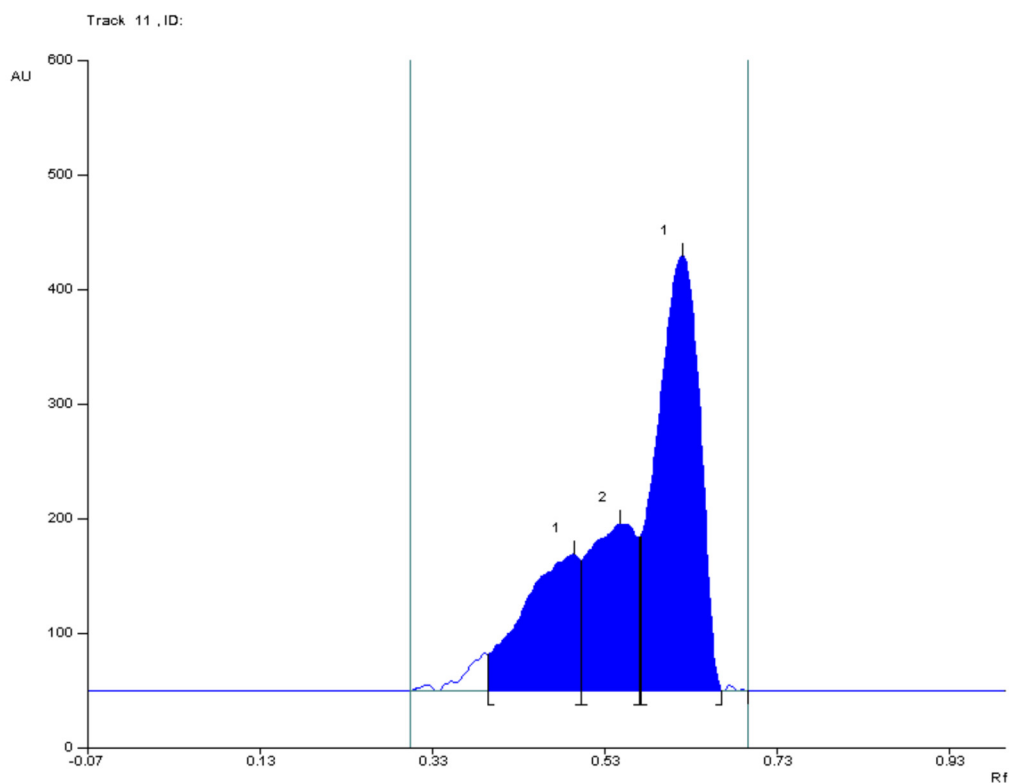

**Figure S4:** Densitogram of valproic acid after detection by spraying with 2', 7'-dichlorofluorescein - aluminum chloride-iron (III) chloride system as the developing reagent.

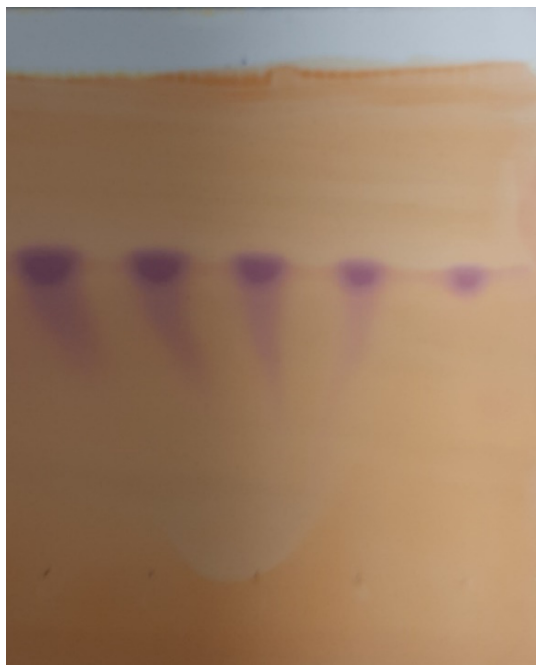

**Figure S5:** Valproic acid after detection by immersion of the chromatographic plate in the components of the system 2', 7'-dichlorofluorescein - aluminum chloride-iron (III) chloride.

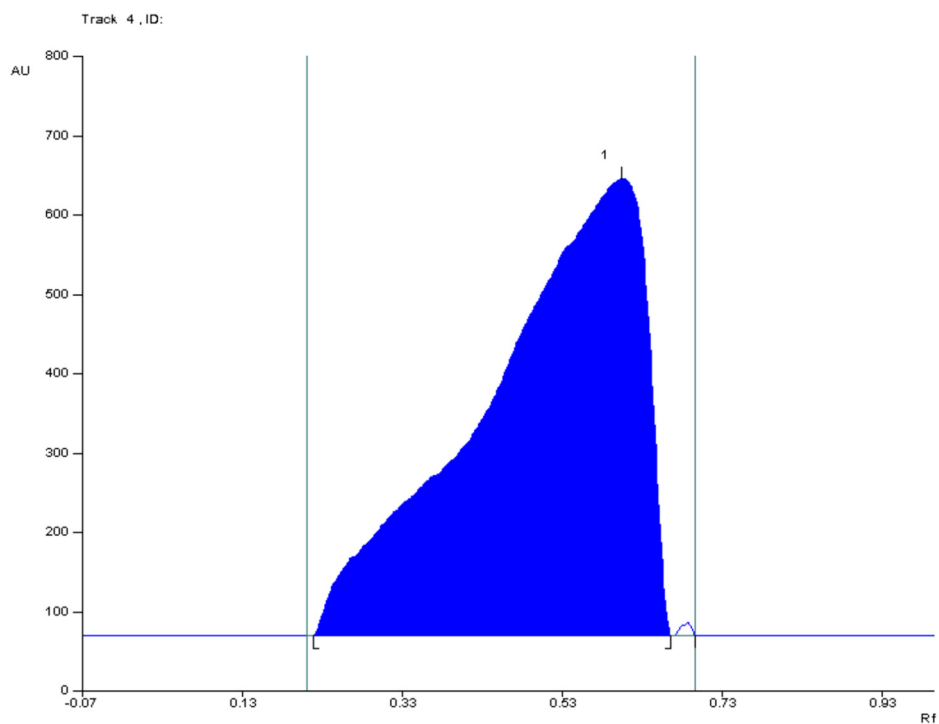

**Figure S6:** Densitogram of valproic acid after detection by immersion of the chromatographic plate in the components of the system 2', 7'-dichlorofluorescein-aluminum chloride-iron (III) chloride (fourth lane in the above photo).

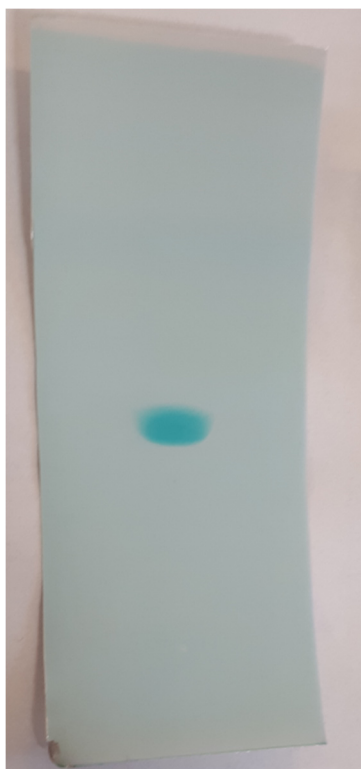

**Figure S7:** Valproic acid after detection with 2% aqueous solution of  $\text{CuSO}_4$  by immersion of the plate.

**Table S1.** Results of densitometric analysis of standard solutions of valproic acid (mean from n = 3) after detection with 2% aqueous solution of CuSO<sub>4</sub> by immersion of the plate.

| The amount of valproic acid<br>[ $\mu\text{g/spot}$ ] | Chromatographic band area of<br>spot [AU] |
|-------------------------------------------------------|-------------------------------------------|
| 100                                                   | 10916                                     |
| 90                                                    | 9195                                      |
| 80                                                    | 8997                                      |
| 70                                                    | 8377                                      |
| 60                                                    | 7584                                      |
| 50                                                    | 6476                                      |
| 40                                                    | 5243                                      |
| 30                                                    | 3955                                      |
| 20                                                    | 2924                                      |

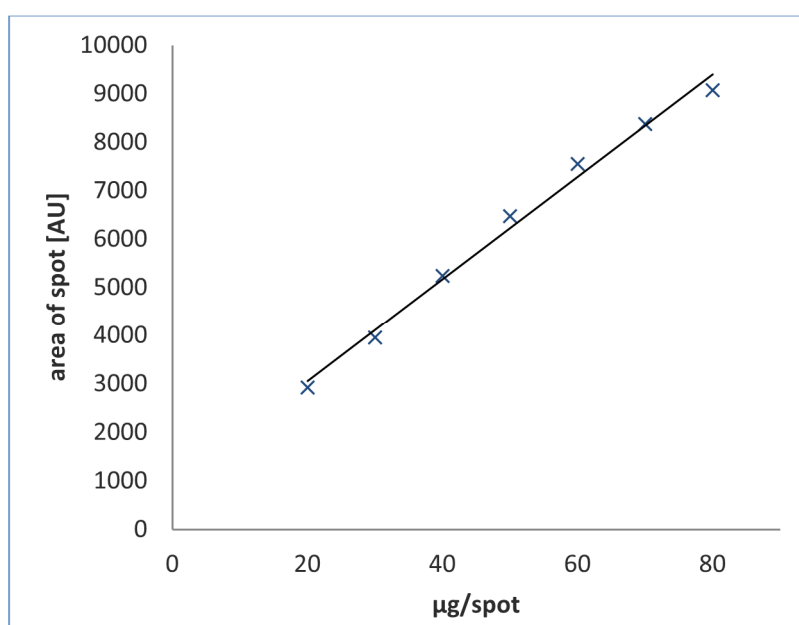

**Figure S8.** Calibration curve of valproic acid after detection with 2% aqueous solution of CuSO<sub>4</sub> by immersion of the plate.

**Table S2.** Results of densitometric measurements of standard solutions of valproic acid (mean from n = 3) after detection by immersion of the chromatographic plate in the components of the system 2', 7'-dichlorofluorescein - aluminum chloride-iron (III) chloride.

| The amount of valproic acid<br>[ $\mu\text{g/spot}$ ] | Chromatographic band area of<br>spot [AU] |
|-------------------------------------------------------|-------------------------------------------|
| 2.0                                                   | 13224                                     |
| 1.9                                                   | 11985                                     |
| 1.8                                                   | 11089                                     |
| 1.7                                                   | 10725                                     |
| 1.6                                                   | 9858                                      |
| 1.5                                                   | 9423                                      |
| 1.4                                                   | 8625                                      |
| 1.3                                                   | 8023                                      |
| 1.2                                                   | 7255                                      |
| 1.1                                                   | 6485                                      |
| 1.0                                                   | 6108                                      |

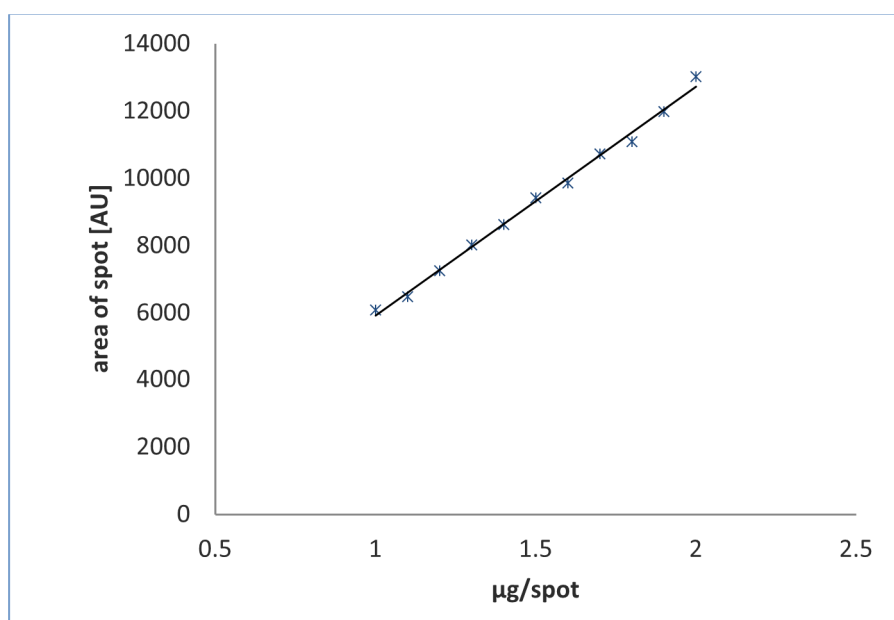

**Figure S9.** Calibration curve of valproic acid after detection by immersion of the chromatographic plate in the components of the system 2', 7'-dichlorofluorescein - aluminum chloride-iron (III) chloride.
